# Supplementary material for: P311 Deficiency Leads to Attenuated Angiogenesis in Cutaneous Wound Healing
Source: PubMed Central journal article supplement (PMC5723677; doi:10.3389/fphys.2017.01004), 2017-12-06
Supplement: DataSheet1.pdf [file DataSheet1.pdf]

## *Supplementary Material*

### **P311 deficiency leads to attenuated angiogenesis in cutaneous wound healing**

**Song Wang \***

\* **Correspondence:** Weifeng He:whe761211@aliyun.com or Gaoxing Luo:logxw@yahoo.com(GL).

#### **1 Supplementary Data**

Supplementary S1. P311 deficiency impaired mDMECs migration in vitro. The up panel stands for mDMECs from P311 KO mice, while the down panel represents mDMECs from P311 WT mice.

#### **2 Supplementary Figures**

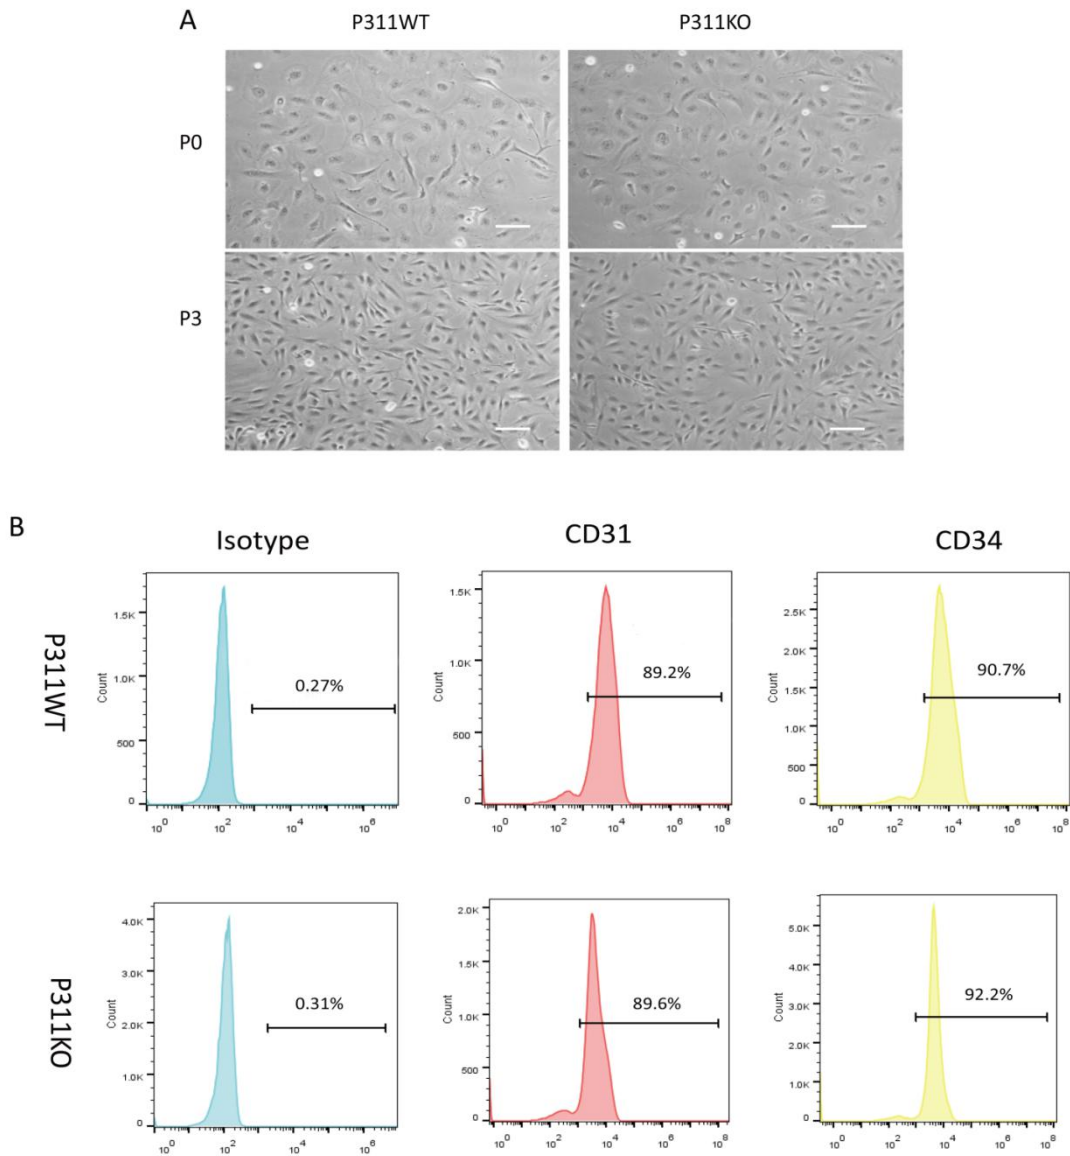

**Supplementary Figure 1.** The Characterization of cultured murine dermal microvascular endothelial cells (mDMECs).A. The morphology of cultured cells at passage 0 and at passage 3. B. mDMECs at passage 3 express a high level of CD31 and CD34 as shown by flow cytometry analysis. FITC-conjugated specific CD31(11-0311-8,Bioscience) and PE-conjugated specific CD34 (119307,Biolegend) were used.

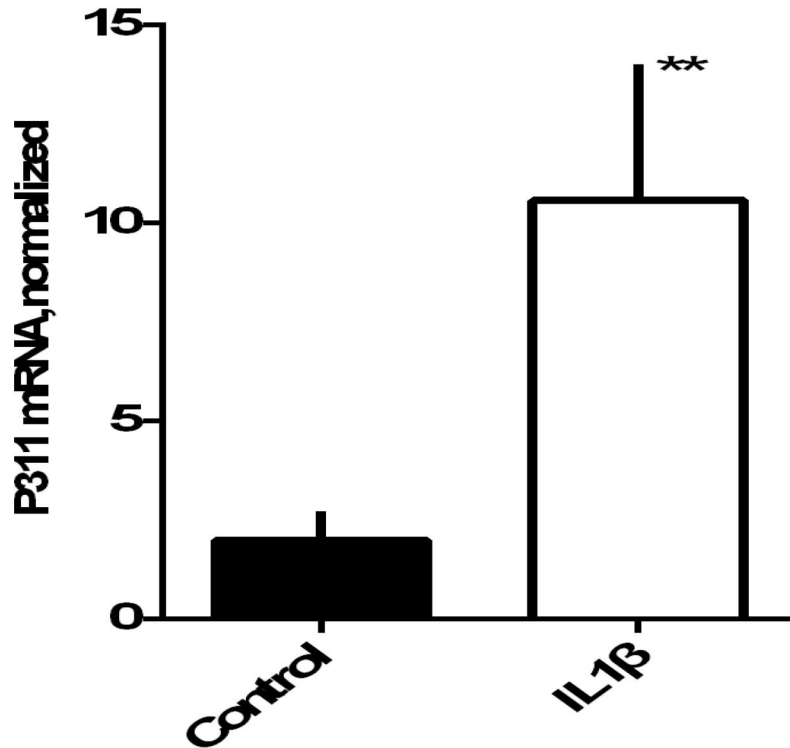

**Supplementary Figure 2.** P311 was up-regulated by of IL1 $\beta$ (a common injury signal). mDMECs at passage 3 were stimulated with 10ng/ml IL1 $\beta$  for 48 hours. The primers: P311,5'-GAGGCTTCCTAAGGGAAGACTT-3' and 5'-AAGTGGAGGTAAC TGATTCTTGG-3'; GAPDH, 5'-CGTGCCGCCTGGAGAAAC-3' and 5'-AGTGGGAGTTGCTGTTGAAGTC-3'.
